# Supplementary material for: Dual stimuli-responsive coating designed through layer-by-layer assembly of PAA-b-PNIPAM block copolymers for the control of protein adsorption
Source: Royal Society of Chemistry journal article supplement (doi:10.1039/c5sm01545f), 2015-01-01
Supplement: c5sm01545f1.pdf [file c5sm01545f1.pdf]

**Supporting information to:**

**Dual stimuli-responsive coating designed through layer-by-layer assembly of  
PAA-b-PNIPAM block copolymers for the control of protein adsorption**

A. Osypova<sup>a, b, c</sup>, D. Magnin<sup>a</sup>, P. Sibret<sup>d</sup>, A. Aqil<sup>d</sup>, C. Jérôme<sup>d</sup>, C. Dupont-Gillain<sup>a</sup>, C.-  
M. Pradier<sup>b, c</sup>, S. Demoustier-Champagne<sup>a, \*</sup>, J. Landoulsi<sup>b, c, \*</sup>

<sup>a</sup> *Institute of Condensed Matter and Nanosciences, Bio & Soft Matter, Université catholique de Louvain, Croix du  
Sud 1 (L7.04.01), 1348, Louvain-la-Neuve, Belgium*

<sup>b</sup> *Sorbonne Universités, UPMC Univ Paris 06, F-75005, Paris, France*

<sup>c</sup> *CNRS, UMR 7197, Laboratoire de Réactivité de Surface, F-75005, Paris, France*

<sup>d</sup> *Center for Education and Research on Macromolecules (CERM), Chemistry Department, University of Liege  
(ULg), Sart-Tilman, B6a, 4000 Liège, Belgium*

\* corresponding authors : [sophie.demoustier@uclouvain.be](mailto:sophie.demoustier@uclouvain.be), [jessem.landoulsi@upmc.fr](mailto:jessem.landoulsi@upmc.fr)

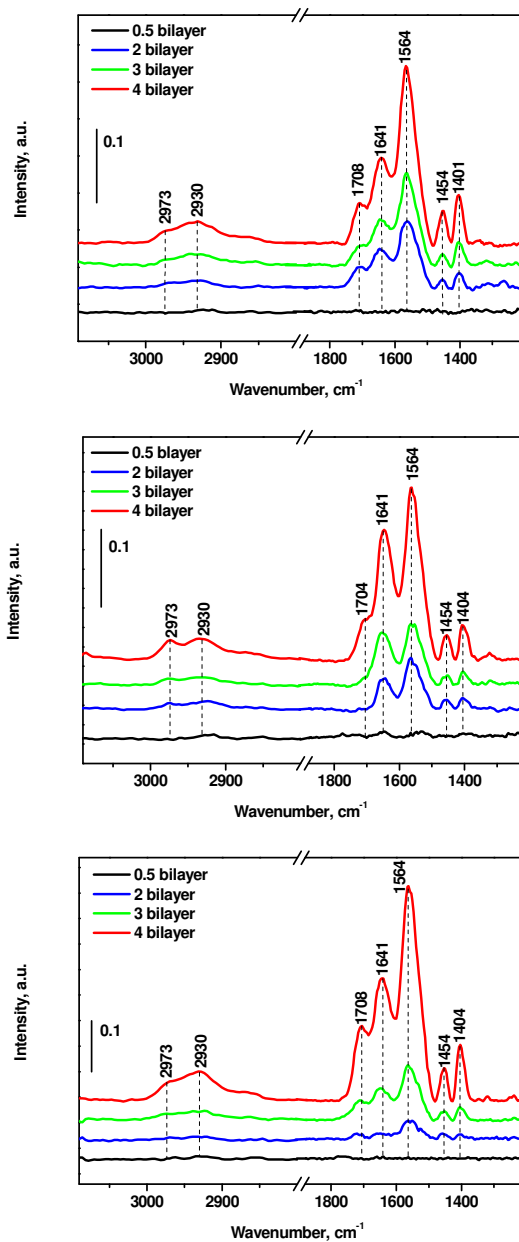

**Figure S1.** PM-IRRAS spectra recorded on PEMs made of PAH and (from top to bottom) F10, F11 and F22 copolymers.

The degree of ionization of carboxylic groups in PAA chains can be determined using the absorbance of the vibration bands associated with the symmetric and antisymmetric stretching modes of the  $\text{COO}^-$  moiety at about  $1404$  and  $1546 \text{ cm}^{-1}$ ,  $A_{\text{vs}}(\text{COO}^-)$  and  $A_{\text{vas}}(\text{COO}^-)$ , respectively, and the absorbance band at  $1710 \text{ cm}^{-1}$  attributed to  $\nu(\text{C}=\text{O})$ , as follows:

$$\alpha = \frac{A_{\text{vs}}(\text{COO}^-) + A_{\text{vas}}(\text{COO}^-)}{A_{\text{vs}}(\text{COO}^-) + A_{\text{vas}}(\text{COO}^-) + 1.74 \times A_{\text{v}}(\text{C}=\text{O})} \quad (\text{Eq. 1})$$

where  $1.74$  is a coefficient taking into account the difference in the absorbance of the three bands.<sup>1</sup>

However, in the present study, the band due to antisymmetric stretching of  $\text{COO}^-$  moiety,  $\nu_{\text{as}}(\text{COO}^-)$  is overlapping with amide II band, originating from PNIPAM, and vibrational features of  $-\text{NH}_2$  groups from PAH. Thus it could not be exploited for the calculation of  $\alpha$ . Moreover, PM-IRRAS bands can be affected by the degree of “disorder” of PEMs, as the configuration used for this technique is sensitive to the orientation of molecules on the plane surface.

For these reasons, only a rough estimation of the fraction of ionized PAA groups can be performed by using a simplified expression as follows:

$$f_{\text{COO}^-} = \frac{A_{\text{vs}}(\text{COO}^-)}{A_{\text{vs}}(\text{COO}^-) + 1.74 \times A_{\text{v}}(\text{C}=\text{O})} \quad (\text{Eq. 2})$$

**Table S1.** Rough estimation of the fraction of ionized PAA groups ( $f_{COO^-}$ ) in different polyelectrolyte multilayers

(PEM) calculated using Eq. 2. Standard deviation is presented between brackets.

| PEM                     | $f_{COO^-}$  |              |
|-------------------------|--------------|--------------|
| <b>After build-up</b>   |              |              |
| (PAH/F10) <sub>4</sub>  | 0.30         |              |
| (PAH/F11) <sub>4</sub>  | 0.34 (0.03)  |              |
| (PAH/F22) <sub>4</sub>  | 0.38 (0.02)  |              |
| (PAH/PAA) <sub>4</sub>  | 0.37 (0.06)  |              |
| <b>After incubation</b> |              |              |
| <b>pH ~ 3.9</b>         |              |              |
|                         | <b>20 °C</b> | <b>50 °C</b> |
| (PAH/F22) <sub>4</sub>  | 0.19         | 0.27         |
| (PAH/PAA) <sub>4</sub>  | 0.25         | 0.25         |
| <b>pH ~ 5.7</b>         |              |              |
|                         | <b>20 °C</b> | <b>50 °C</b> |
| (PAH/F22) <sub>4</sub>  | 0.40         | 0.37         |
| (PAH/PAA) <sub>4</sub>  | 0.34         | 0.37         |
| <b>pH ~ 8.1</b>         |              |              |
|                         | <b>20 °C</b> | <b>50 °C</b> |
| (PAH/F22) <sub>4</sub>  | 0.67         | 0.56         |
| (PAH/PAA) <sub>4</sub>  | 0.57         | 0.63         |

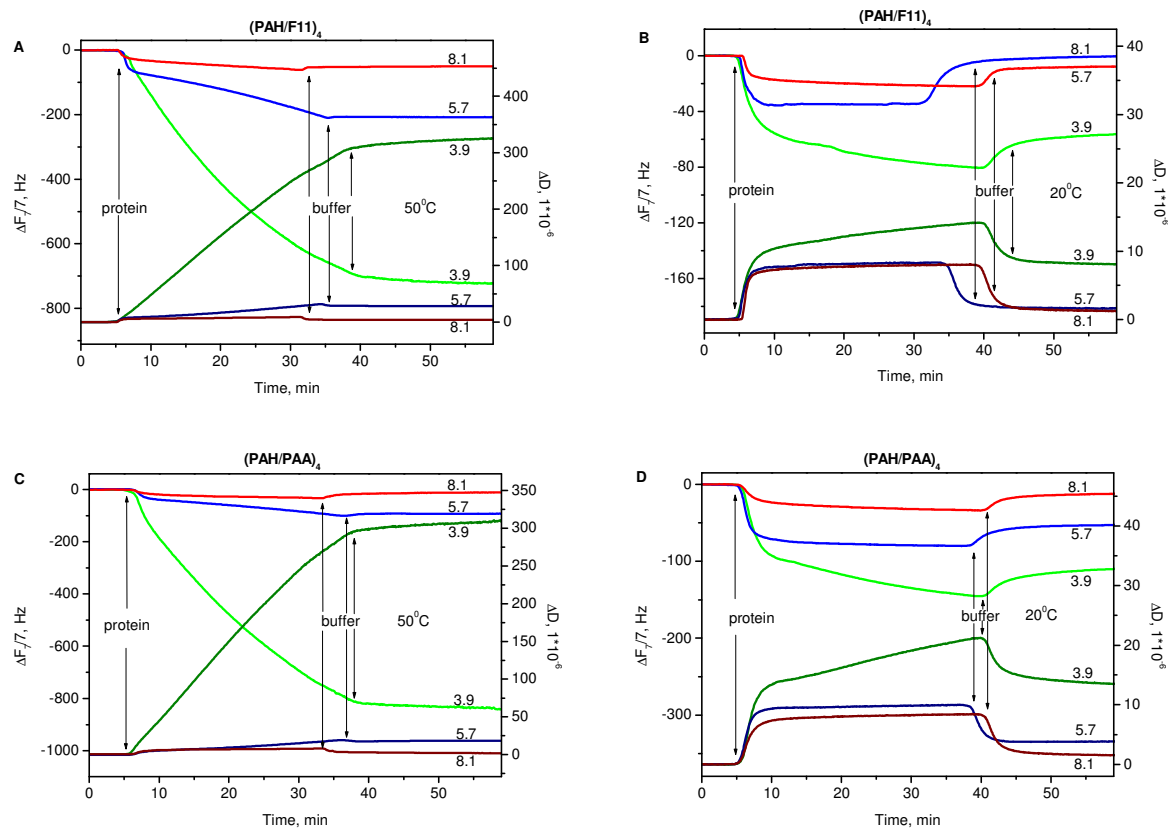

**Figure S2.** Representative QCM-D measurements showing frequency changes in the 7<sup>th</sup> overtone and the corresponding dissipation vs time during the adsorption of ovalbumin (25 mg ml<sup>-1</sup>) on (PAH-F11)<sub>4</sub> (A and B) and (PAH-PAA)<sub>4</sub> (C and D). Protein adsorption was performed in acetate buffer adjusted at acidic (pH~3.9) or basic (pH~8.1) conditions, either at 20 or 50<sup>o</sup>C, as indicated.

## Reference

1. M. Muller, M. Brissova, T. Rieser, A. C. Powers and K. Lunkwitz, *Mater. Sci. Eng., C* 1999, **8-9**, 163.
